# Supplementary material for: Development of a multi-isotopic (Pb, Fe, Cu) analytical protocol in gold matrices for ancient coin provenance studies
Source: Royal Society of Chemistry journal article supplement (doi:10.1039/d3ja00312d), 2024-01-01
Supplement: d3ja00312d1.xlsx [file d3ja00312d1.xlsx]

## Sheet: Feuil1
Detailed Cu, Fe and Pb isotopic results
		∂65Cu NIST-976	∂57Fe IRMM-14	∂56Fe IRMM-14	208Pb/204Pb	207Pb/204Pb	206Pb/204Pb	208Pb/206Pb	207Pb/206Pb
Pure Cu		0.207141
		0.145387
		0.0965045
		0.269198
		0.21782
		0.21482
		0.294009
		0.28278
		0.287825
		0.213451
		0.238716
		0.232383
		0.239248
		0.2395
		0.211969
		0.230113
		0.253487
		0.248348
		0.216338
		0.201654
		0.205004
		0.200896
		0.204496
		0.235862
		0.212257
		0.224321
		0.0890354
		0.246092
		0.24601
		0.245722
		0.241128
		0.204535
		0.242222
		0.205016
		0.225059
		0.215685
		0.23914
		0.246915
		0.250565
Pure Cu + chromatography	*	1.54567
	*	1.63274
	*	1.5953
	*	1.47623
	*	1.48729
	*	1.46261
	°	-1.37077
	°	-1.39983
	°	-1.355
	°	-1.40546
	°	-1.41303
	°	-1.40629
Pure Fe			0.502953	0.337387
			0.521383	0.37317
			0.565515	0.355268
			0.328326	0.184318
			0.328189	0.20896
			0.522849	0.339802
Pure Fe + chromatography			0.342129	0.241382
			0.371659	0.234519
			0.248849	0.184707
			0.283038	0.193375
			0.383807	0.253346
			0.437101	0.312834
			0.430467	0.301832
			0.377305	0.276754
			0.318245	0.240187
Pure Pb					37.6425	15.5697	17.7597	2.11927	0.876689
					37.6465	15.5697	17.7603	2.11946	0.876655
					37.6407	15.5682	17.7582	2.1194	0.876635
					37.6424	15.5699	17.7602	2.1193	0.876671
					37.6426	15.5699	17.7603	2.1193	0.876668
					37.6429	15.5711	17.7617	2.11918	0.876666
					37.6473	15.572	17.7624	2.11935	0.876687
					37.645	15.5714	17.7627	2.11913	0.876638
					37.6427	15.5707	17.7621	2.11907	0.876628
					37.6463	15.5717	17.7628	2.11919	0.876652
					37.6532	15.5744	17.765	2.11934	0.876679
					37.6462	15.5717	17.7629	2.11917	0.876646
					37.6436	15.5709	17.7621	2.11912	0.87663
					37.6433	15.5695	17.7592	2.11947	0.876698
					37.6438	15.5696	17.7597	2.11945	0.876685
					37.6423	15.5691	17.7591	2.11944	0.876689
					37.6412	15.5686	17.7587	2.11941	0.876677
Pure Pb + chromatography					37.6393	15.5691	17.7602	2.1191	0.876631
					37.6456	15.572	17.763	2.11915	0.876652
					37.6431	15.5705	17.7615	2.11916	0.876635
					37.6432	15.5707	17.7617	2.11914	0.876645
Au1		0.177079	0.332955	0.122426	37.6051	15.5563	17.7468	2.1187	0.876587
		0.0867199	0.391502	0.300361	37.6204	15.5606	17.7513	2.11907	0.87658
		0.00841243	0.456142	0.279251	37.6203	15.5607	17.7523	2.11897	0.876545
		0.254181	0.519043	0.295316	37.6262	15.5644	17.7556	2.11894	0.87659
		0.20293	0.423278	0.276021	37.6268	15.5647	17.756	2.11893	0.87659
		0.197106	0.376777	0.283112	37.6291	15.5661	17.7586	2.11872	0.876539
		0.183554	0.352759	0.255845	37.6314	15.5676	17.7603	2.11867	0.876534
		0.164923	0.498751	0.330558
		0.192814	0.346564	0.260165
		0.238919	0.193319	0.109002
		0.22147	0.528167	0.351884
		0.22147	0.353354	0.23941
Au2		0.27163	0.370051	0.269603	37.621	15.5611	17.753	2.11892	0.876537
		0.194432	0.417426	0.18333	37.6262	15.5646	17.7558	2.11892	0.876592
		0.102577	0.320129	0.1852	37.6262	15.5646	17.7559	2.11891	0.87659
		0.310718	0.390238	0.276294	37.6307	15.5669	17.7592	2.11873	0.876554
		0.305403	0.433259	0.266304	37.6256	15.5649	17.7568	2.11874	0.876552
		0.26264	0.412001	0.252519
		0.230162	0.260456	0.215745
		0.26721	0.450249	0.283712
		0.225719	0.309141	0.169
		0.274926
		0.289765
		0.265085
Au3		0.32149	0.527935	0.310993	37.6137	15.5602	17.7514	2.11864	0.876565
		0.269715	0.365335	0.300771	37.6251	15.5625	17.7546	2.11896	0.876534
		0.283324	0.441022	0.323277	37.6282	15.5653	17.7567	2.11893	0.876591
		0.214547	0.428864	0.279478	37.6261	15.5646	17.756	2.11889	0.876581
		0.203612	0.358924	0.241674	37.63	15.5668	17.759	2.11873	0.876554
		0.230033	0.352714	0.249448	37.63	15.5668	17.7593	2.11869	0.876543
		0.262945	0.385408	0.26973	37.6276	15.5659	17.758	2.11871	0.876548
		0.25752	0.377222	0.284722	37.6261	15.566	17.7585	2.11859	0.876543
		0.25752	0.35049	0.233427	37.631	15.5668	17.7591	2.11877	0.876552
			0.427236	0.286264	37.6293	15.5665	17.7588	2.11872	0.876546
			0.440214	0.306174	37.6315	15.567	17.7595	2.11875	0.876549
			0.409611	0.287646	37.6297	15.5669	17.7594	2.11869	0.876549
					37.6268	15.5642	17.7552	2.11902	0.876602
					37.6264	15.5642	17.7553	2.11899	0.876595
					37.6276	15.5645	17.7555	2.11903	0.876598
					37.6264	15.5641	17.7549	2.11903	0.876607
Dinar		2.71231	0.92354	0.620332	38.4365	15.6099	18.3756	2.09151	0.849487
		2.61439	0.974051	0.623414	38.4219	15.6045	18.3679	2.09163	0.849557
		2.65781	0.981496	0.645214	38.421	15.6044	18.3676	2.09161	0.849562
		2.66242	0.980122	0.566614	38.4728	15.6259	18.3939	2.09144	0.849515
		2.65799	0.989707	0.642998	38.4778	15.6277	18.3959	2.09148	0.849523
		2.66463	0.980579	0.673673	38.4694	15.6244	18.3922	2.09144	0.849511
		2.75107	0.999089	0.714336
		2.74649	1.00906	0.663788
		2.70838	0.719604	0.509637
		2.54053	0.831025	0.545163
		2.57427	1.04472	0.711897
		2.57978	0.851709	0.58043
			0.909251	0.636393
			0.996166	0.68058
			0.927119	0.630278
1813		0.182862	0.0818204	0.0131744	38.073	15.5895	18.1623	2.096	0.858342
		0.204227	0.0945844	0.0388629	38.0902	15.5974	18.1725	2.09579	0.858296
		0.179752	0.0848646	0.0590381	38.0891	15.5933	18.1662	2.09649	0.858365
		0.16223	0.0357875	0.0539071	38.1004	15.5999	18.1731	2.09635	0.858407
		0.172962	0.1188	0.0900531	38.1	15.5997	18.1729	2.09635	0.858407
		0.157502	-0.00714814	0.0305376	38.1189	15.6076	18.1832	2.09618	0.858351
			0.12997	0.0762039
			0.107287	0.0629823
			0.044251	0.0460502
1878		0.240696	-0.287044	-0.208425	38.4208	15.6221	18.3456	2.09401	0.851532
		0.206568	-0.188184	-0.159546	38.4186	15.622	18.3461	2.09386	0.851514
		0.241643	-0.0938432	-0.0601261	38.4263	15.6222	18.3454	2.09437	0.851562
		0.171075	-0.173447	-0.11972	38.4291	15.6237	18.3475	2.09431	0.851542
		0.186305	-0.14351	-0.0856091	38.4668	15.6409	18.3683	2.094	0.851511
		0.174181	-0.0939538	-0.0620197	38.4617	15.6399	18.368	2.09378	0.851484
					38.4637	15.6399	18.3675	2.09391	0.851499
					38.4637	15.6399	18.3674	2.09393	0.851505
					38.4666	15.6411	18.3686	2.09395	0.851508
					38.4656	15.6413	18.3692	2.09386	0.851496
					38.4484	15.6324	18.3572	2.09429	0.851566
					38.4497	15.6328	18.3575	2.09432	0.851575
					38.4461	15.6317	18.3564	2.09425	0.851568
					38.4477	15.6324	18.3573	2.09423	0.851565
Léon		0.341677	0.176011	0.112484	38.6908	15.6711	18.5683	2.0835	0.84397
		0.343226	-0.0545812	-0.0203895	38.6846	15.67	18.5675	2.08329	0.843941
		0.359432	-0.0789988	-0.0756583	38.6877	15.6699	18.5669	2.08349	0.843974
		0.336451	-0.033914	0.00363482	38.6888	15.6705	18.5674	2.08349	0.843978
		0.341782	-0.118802	-0.05603
		0.346868	-0.1563	-0.110561
Louis XIII		0.347175	0.188345	0.139048	38.3592	15.6264	18.3732	2.08757	0.850496
		0.357404	0.207875	0.170394	38.3544	15.6258	18.3733	2.08733	0.85046
		0.346322	0.669946	0.471	38.3584	15.6263	18.3732	2.08753	0.850492
		0.310613	0.236939	0.168724	38.3553	15.6253	18.3721	2.08749	0.850482
		0.333105	0.260826	0.172584
		0.3092	0.367189	0.250703
			0.14063	0.0829615
			0.152043	0.0796576
			0.110699	0.0939433
1812		0.342972	0.21689		37.7576	15.5756	17.888	2.11061	0.870719
		0.400942	0.143879		37.7495	15.573	17.886	2.11038	0.870671
		0.359877	0.325562		37.7478	15.5708	17.8826	2.11069	0.870728
		0.223077	0.0561437	0.0547041	37.745	15.5695	17.8813	2.11068	0.870708
		0.247746	0.132219	0.079367
		0.281504	0.0475003	0.033537
			0.172841	0.121644
			0.208302	0.137736
			0.160273	0.11672
1814		0.456304	0.0985635	0.0791155	37.9572	15.596	18.0531	2.10236	0.863892
		0.445668	0.112138	0.0503702	37.9497	15.5935	18.0509	2.1022	0.863861
		0.345592	0.205451	0.127356	37.9516	15.5923	18.0479	2.10265	0.863947
		0.28628	-0.22401	-0.130611	37.9522	15.5927	18.0481	2.10266	0.863949
		0.278042	-0.173288	-0.122155
		0.281426	-0.100564	-0.0661246
			0.183626	0.123558
			0.208285	0.150441
			0.251911	0.175441
1855		0.344122	0.0825511	0.0404659	38.5844	15.6546	18.5555	2.07922	0.843669
		0.389356	0.123531	0.0902835	38.5831	15.6543	18.5551	2.07921	0.843663
		0.350988	0.239045	0.147491	38.5831	15.6536	18.5545	2.07925	0.84366
		0.226281			38.5816	15.6536	18.5547	2.07918	0.843654
		0.223504
		0.233431
1856		0.458766	-0.222182	-0.12932	38.6475	15.6681	18.5088	2.08787	0.846517
		0.450603	-0.274074	-0.170734	38.6458	15.6681	18.5093	2.08774	0.846495
		0.412583	-0.358961	-0.28435	38.6461	15.6674	18.5084	2.08783	0.846505
		0.270738	-0.146614	-0.101959	38.6453	15.6672	18.5083	2.0878	0.846494
		0.248884	-0.175145	-0.114874
		0.230557	-0.0533217	-0.0378225
1863		0.458528	0.329549	0.221421	38.4888	15.6568	18.4143	2.08997	0.850243
		0.43915	0.249787	0.181395	38.4658	15.6502	18.4092	2.08932	0.850134
		0.443163	0.0941519	0.0878959	38.4673	15.6501	18.409	2.0894	0.850134
		0.247233			38.4648	15.6494	18.4082	2.08935	0.850129
		0.25366
		0.24139
	* corresponding to the first part eluted, 2/3 of the sample
	° corresponding to the second part eluted, 1/3 of the sample
